# Supplementary material
Source: Research Square preprint supplement (doi:10.21203/rs.3.rs-9939085/v1)
Supplement: Supplementary file 1 [file 07083c342b354e1a71ddc2ce.docx]

**Tools used for evaluation**

**Tool 1: mDISCERN**

| **Statement** | **Score** |
| --- | --- |
| Are the aims of the video clearly stated and achieved? | Yes -1; No = 0 |
| Are reliable sources of information used? | Yes -1; No = 0 |
| Is the information presented balanced and unbiased? | Yes -1; No = 0 |
| Are additional sources of information listed for farmer's reference? | Yes -1; No = 0 |
| Are areas of uncertainty mentioned? | Yes -1; No = 0 |

**Tool 2: JAMA benchmark criteria**

| **Statement** | **Score** |
| --- | --- |
| Authorship – Are authors and credentials identified? | Yes -1; No = 0 |
| Attribution – Are references and sources cited? | Yes -1; No = 0 |
| Disclosure – Are conflicts of interest stated? | Yes -1; No = 0 |
| Currency – Is the content dated? | Yes -1; No = 0 |

**Tool 3: Global Quality Scale**

| **Quality** | **Score** |
| --- | --- |
| Poor quality, poor flow, most information missing, not helpful | 1 |
| Generally poor, some information but many important topics missing | 2 |
| Moderate quality, some important information discussed adequately | 3 |
| Good quality, useful information, mostly complete | 4 |
| Excellent quality, very useful, comprehensive and well structured | 5 |

**Tool 4: Mastitis Content Score**

| **Component** | **Score** |
| --- | --- |
| Types of mastitis | 1 = Discussed, 0 = Not Discussed |
| Symptoms | 1 = Discussed, 0 = Not Discussed |
| Causes | 1 = Discussed, 0 = Not Discussed |
| Transmission pathways | 1 = Discussed, 0 = Not Discussed |
| Diagnosis/detection methods | 1 = Discussed, 0 = Not Discussed |
| Treatment methods | 1 = Discussed, 0 = Not Discussed |
| Impact if treatment is started early or delayed | 1 = Discussed, 0 = Not Discussed |
| Prevention | 1 = Discussed, 0 = Not Discussed |
| Responsible antibiotic usage | 1 = Discussed, 0 = Not Discussed |
| Mention of withdrwal period | 1 = Discussed, 0 = Not Discussed |
